# Supplementary material for: Within- and cross-species predictions of plant specialized metabolism genes using transfer learning
Source: PubMed Central journal article supplement (PMC7731531; doi:10.1093/insilicoplants/diaa005), 2020-07-30
Supplement: diaa005_suppl_supplementary_figure_s9.pdf [file diaa005_suppl_supplementary_figure_s9.pdf]

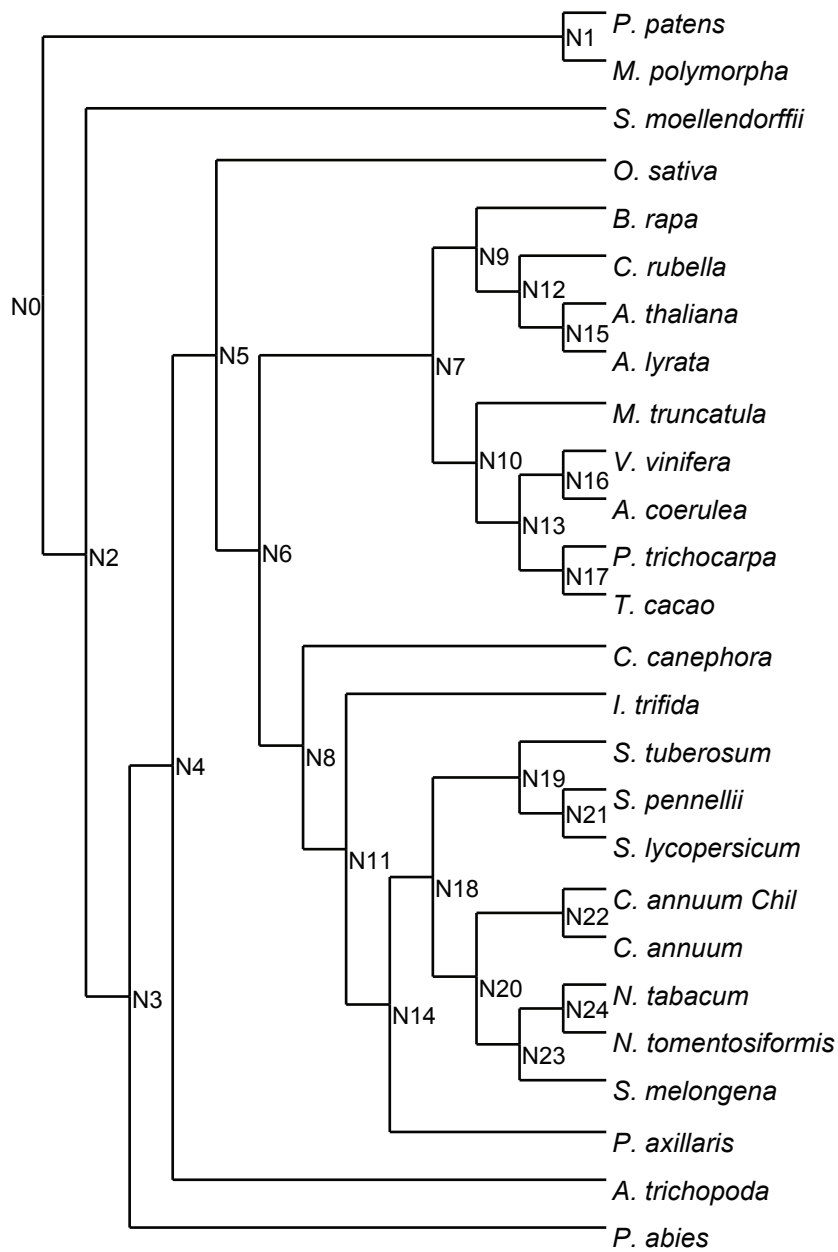

**Supplemental Figure 9: Speciation nodes**

Phylogenetic tree of 26 species showing speciation nodes (N0-N24). Most recent gene duplication node in text refers to the speciation node where gene was last duplicated.
